# Supplementary material for: Combined QTL Mapping across Multiple Environments and Co-Expression Network Analysis Identified Key Genes for Embryogenic Callus Induction from Immature Maize Embryos
Source: MDPI journal article supplement (doi:10.3390/ijms23158786), 2022-08-07
Supplement: s1 [file s1]

|        |                                                                                                                   |
|--------|-------------------------------------------------------------------------------------------------------------------|
| Mo17   | CTGCAGGCTG <b>T</b> GTGGCTCTCATGCTTCTCATCACACCAAC <b>C</b> CATGGTGACTCCGATTCCGGAGCAGAG <b>---</b> CTACAAGATGGCTCG |
| IBM003 | CTGCAGGCTGCGTGGCTCTCATGCTTCTCATCACACCAAC <b>C</b> CATGGTGACTCCGATTCCGGAGCAGAG <b>---</b> CTACAAGATGGCTCG          |
| IBM097 | CTGCAGGCTG <b>T</b> GTGGCTCTCATGCTTCTCATCACACCAAC <b>C</b> CATGGTGACTCCGATTCCGGAGCAGAG <b>---</b> CTACAAGATGGCTCG |
| IBM182 | CTGCAGGCTG <b>T</b> GTGGCTCTCATGCTTCTCATCACACCAAC <b>C</b> CATGGTGACTCCGATTCCGGAGCAGAG <b>---</b> CTACAAGATGGCTCG |
| IBM270 | CTGCAGGCTG <b>T</b> GTGGCTCTCATGCTTCTCATCACACCAAC <b>C</b> CATGGTGACTCCGATTCCGGAGCAGAG <b>---</b> CTACAAGATGGCTCG |
| IBM304 | CTGCAGGCTG <b>T</b> GTGGCTCTCATGCTTCTCATCACACCAAC <b>C</b> CATGGTGACTCCGATTCCGGAGCAGAG <b>---</b> CTACAAGATGGCTCG |
| B73    | CTGCAGGCTGCGTGGCTCTCATGCTTCTCATCACACCAACACATGGTGACT <b>C</b> TGATTCCGGAGCAGAGGAGCTACAAGATGGCTCG                   |
| IBM009 | CTGCAGGCTGCGTGGCTCTCATGCTTCTCATCACACCAACACATGGTGACTCCGATTCCGGAGCAGAGGAGCTACAAGATGGCTCG                            |
| IBM062 | CTGCAGGCTGCGTGGCTCTCATGCTTCTCATCACACCAACACATGGTGACTCCGATTCCGGAGCAGAGGAGCTACAAGATGGCTCG                            |
| IBM144 | CTGCAGGCTGCGTGGCTCTCATGCTTCTCATCACACCAACACATGGTGACTCCGATTCCGGAGCAGAGGAGCTACAAGATGGCTCG                            |
| IBM234 | CTGCAGGCTGCGTGGCTCTCATGCTTCTCATCACACCAACACATGGTGACTCCGATTCCGGAGCAGAGGAGCTACAAGATGGCTCG                            |
| IBM327 | CTGCAGGCTGCGTGGCTCTCATGCTTCTCATCACACCAACACATGGTGACTCCGATTCCGGAGCAGAGGAGCTACAAGATGGCTCG                            |

**Figure S4** Sequence alignment of fragment 4 (F4) among parents and selected DH lines of the IBM Syn10 DH population. IBM003, IBM097, IBM182, IBM270, and IBM304 in green rectangular are high-REC lines, and IBM009, IBM062, IBM090, IBM144, IBM234, and IBM327 in blue rectangular are low-REC lines. The bases in red boxes represent the SNP locus in F4.
