# Supplementary material for: Combined QTL Mapping across Multiple Environments and Co-Expression Network Analysis Identified Key Genes for Embryogenic Callus Induction from Immature Maize Embryos
Source: MDPI journal article supplement (doi:10.3390/ijms23158786), 2022-08-07
Supplement: s1 [file s1]

|        |                                                                             |
|--------|-----------------------------------------------------------------------------|
| Mo17   | TCCTTCGCTGCGGCCAAGTGCCAGCCGGTGGCGGGCCGGGCATCGGCCCGGCGAGCGCCACGGCCACTGTTGCGC |
| IBM003 | TCCTTCGCTGCGGCCAAGTGCCAGCCGGTGGCGGGCCGGGCATCGGCCCGGCGAGCGCCACGGCCACTGTTGCGC |
| IBM097 | TCCTTCGCTGCGGCCAAGTGCCAGCCGGTGGCGGGCCGGGCATCGGCCCGGCGAGCGCCACGGCCACTGTTGCGC |
| IBM182 | TCCTTCGCTGCGGCCAAGTGCCAGCCGGTGGCGGGCCGGGCATCGGCCCGGCGAGCGCCACGGCCACTGTTGCGC |
| IBM270 | TCCTTCGCTGCGGCCAAGTGCCAGCCGGTGGCGGGCCGGGCATCGGCCCGGCGAGCGCCACGGCCACTGTTGCGC |
| IBM304 | TCCTTCGCTGCGGCCAAGTGCCAGCCGGTGGCGGGCCGGGCATCGGCCCGGCGAGCGCCACGGCCACTGTTGCGC |
| B73    | TCCTTCGCTGCGGCCAAGTGCCAGCCGGTGGGTGGCCGGGCATCCGCGCGGCGAGCGCCACGGCCACTGTTGCGC |
| IBM009 | TCCTTCGCTGCGGCCAAGTGCCAGCCGGTGGGTGGCCGGGCATCCGCGCGGCGAGCGCCACGGCCACTGTTGCGC |
| IBM062 | TCCTTCGCTGCGGCCAAGTGCCAGCCGGTGGGTGGCCGGGCATCCGCGCGGCGAGCGCCACGGCCACTGTTGCGC |
| IBM144 | TCCTTCGCTGCGGCCAAGTGCCAGCCGGTGGGTGGCCGGGCATCCGCGCGGCGAGCGCCACGGCCACTGTTGCGC |
| IBM234 | TCCTTCGCTGCGGCCAAGTGCCAGCCGGTGGGTGGCCGGGCATCCGCGCGGCGAGCGCCACGGCCACTGTTGCGC |
| IBM327 | TCCTTCGCTGCGGCCAAGTGCCAGCCGGTGGGTGGCCGGGCATCCGCGCGGCGAGCGCCACGGCCACTGTTGCGC |

**Figure S6** Sequence alignment of fragment 6 (F6) among parents and selected DH lines of the IBM Syn10 DH population. IBM003, IBM097, IBM182, IBM270, and IBM304 in green rectangular are high-REC lines, and IBM009, IBM062, IBM090, IBM144, IBM234, and IBM327 in blue rectangular are low-REC lines. The bases in red boxes represent the SNP locus in F6.
