# Supplementary material for: Combined QTL Mapping across Multiple Environments and Co-Expression Network Analysis Identified Key Genes for Embryogenic Callus Induction from Immature Maize Embryos
Source: MDPI journal article supplement (doi:10.3390/ijms23158786), 2022-08-07
Supplement: s1 [file s1]

|        |                                                                              |
|--------|------------------------------------------------------------------------------|
| Mo17   | GGCGCGGCGCGAGCCACCGGAGGCTACTGCTGCTACACCAGCCGGACACCAACCTCGCCGCGCTGCCTCCACCTGC |
| IBM003 | GGCGCGGCGCGAGCCACCGGAGGCTACTGCTGCTACACCAGCCGGACACCAACCTCGCCGCGCTGCCTCCACCTGC |
| IBM097 | GGCGCGGCGCGAGCCACCGGAGGCTACTGCTGCTACACCAGCCGGACACCAACCTCGCCGCGCTGCCTCCACCTGC |
| IBM182 | GGCGCGGCGCGAGCCACCGGAGGCTACTGCTGCTACACCAGCCGGACACCAACCTCGCCGCGCTGCCTCCACCTGC |
| IBM270 | GGCGCGGCGCGAGCCACCGGAGGCTACTGCTGCTACACCAGCCGGACACCAACCTCGCCGCGCTGCCTCCACCTGC |
| IBM304 | GGCGCGGCGCGAGCCACCGGAGGCTACTGCTGCTACACCAGCCGGACACCAACCTCGCCGCGCTGCCTCCACCTGC |
| B73    | GGCGCGGACGAGCCACCGGAGGCTACTGCTGCTACACCAGCAGGACACCAACCTCGCCGCGCTGCCTCCGCCTGC  |
| IBM009 | GGCGCGGACGAGCCACCGGAGGCTACTGCTGCTACACCAGCAGGACACCAACCTCGCCGCGCTGCCTCCGCCTGC  |
| IBM062 | GGCGCGGACGAGCCACCGGAGGCTACTGCTGCTACACCAGCAGGACACCAACCTCGCCGCGCTGCCTCCGCCTGC  |
| IBM144 | GGCGCGGACGAGCCACCGGAGGCTACTGCTGCTACACCAGCAGGACACCAACCTCGCCGCGCTGCCTCCGCCTGC  |
| IBM234 | GGCGCGGACGAGCCACCGGAGGCTACTGCTGCTACACCAGCAGGACACCAACCTCGCCGCGCTGCCTCCGCCTGC  |
| IBM327 | GGCGCGGACGAGCCACCGGAGGCTACTGCTGCTACACCAGCAGGACACCAACCTCGCCGCGCTGCCTCCGCCTGC  |

**Figure S7** Sequence alignment of fragment 7 (F7) among parents and selected DH lines of the IBM Syn10 DH population. IBM003, IBM097, IBM182, IBM270, and IBM304 in green rectangular are high-REC lines, and IBM009, IBM062, IBM090, IBM144, IBM234, and IBM327 in blue rectangular are low-REC lines. The bases in red boxes represent the SNP locus in F7.
